# Supplementary material for: Two-dimensional H– and F–BX (X = O, S, Se, and Te) photocatalysts with ultrawide bandgap and enhanced photocatalytic performance for water splitting
Source: Royal Society of Chemistry journal article supplement (doi:10.1039/d2ra07487g), 2023-01-01
Supplement: d2ra07487g1.pdf [file d2ra07487g1.pdf]

## Support Information

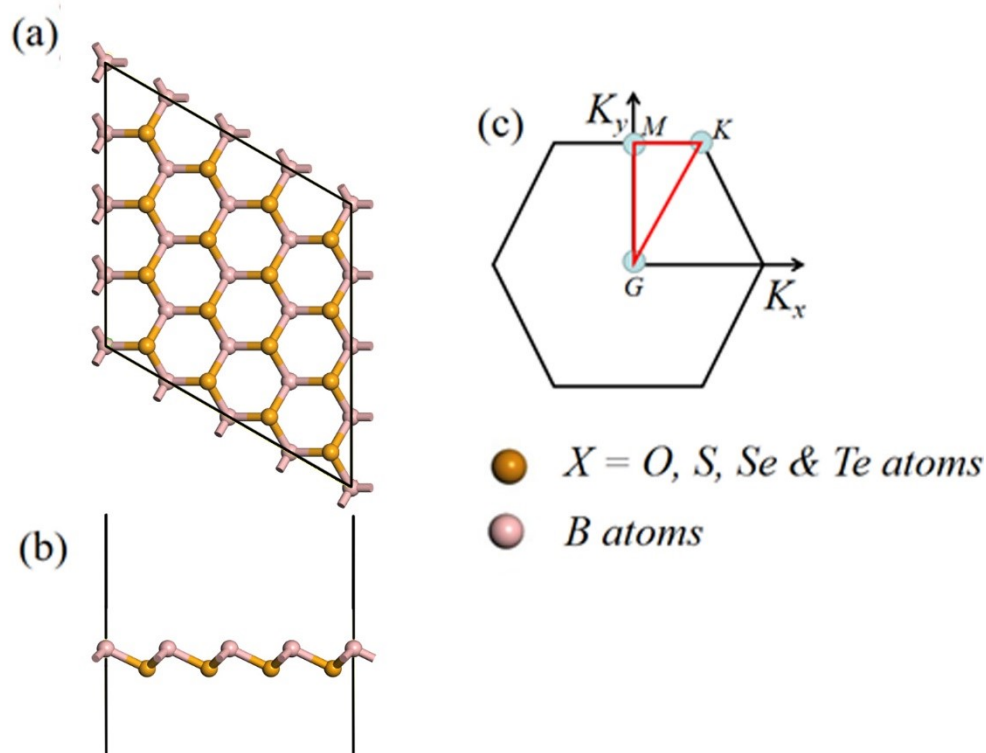

Fig. S1 (a) and (b) Top view and side view of monoatomic-layer hexagonal BX ( $X = O, S, Se,$  and  $Te$ ). (c) Brillouin zone of monolayers H- and F-BX ( $X = O, S, Se,$  and  $Te$ ) with high-symmetry points.

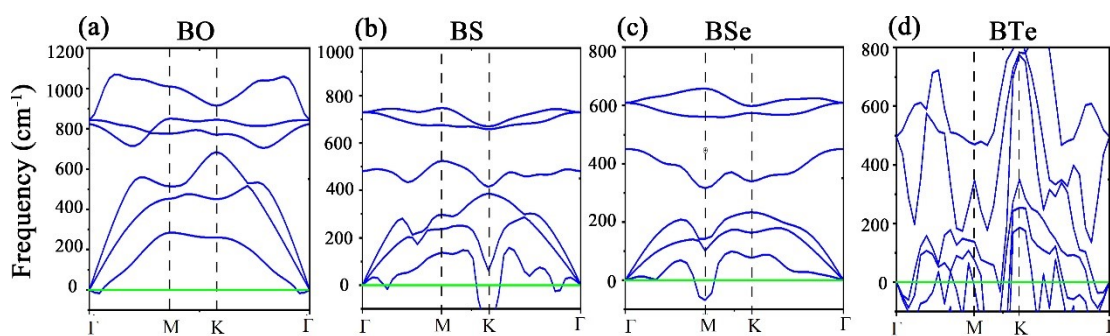

Fig. S2 (a)-(d) the phonon spectra of monoatomic-layer hexagonal BX ( $X = O, S, Se,$  and  $Te$ ).

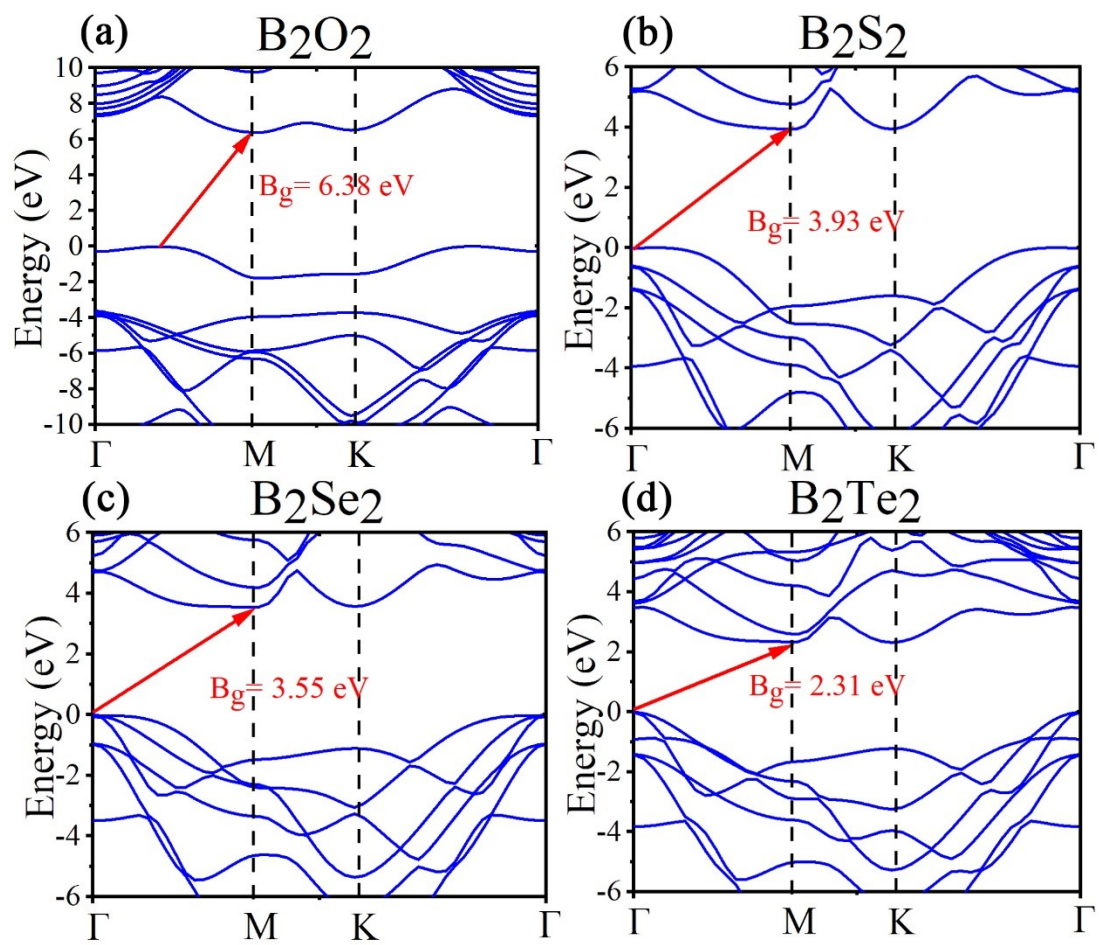

Fig. S3 (a)-(d) Band structures of 1T monolayers  $B_2X_2$  ( $X = O, S, Se, and Te$ ).
